# Supplementary material for: Prognostic Value of Long Noncoding RNA SPRY4‐IT1 on Survival Outcomes in Human Carcinomas: A Systematic Review and Meta‐Analysis with TCGA Database
Source: Hindawi journal article supplement (doi:10.1155/2020/5868602), 2020-01-01

**Supplementary Fig. 1** Forest plots of studies evaluating high SPRY4-IT1 expression in cancers for overall survival.(M Sun and Min Xie studies" were removed)

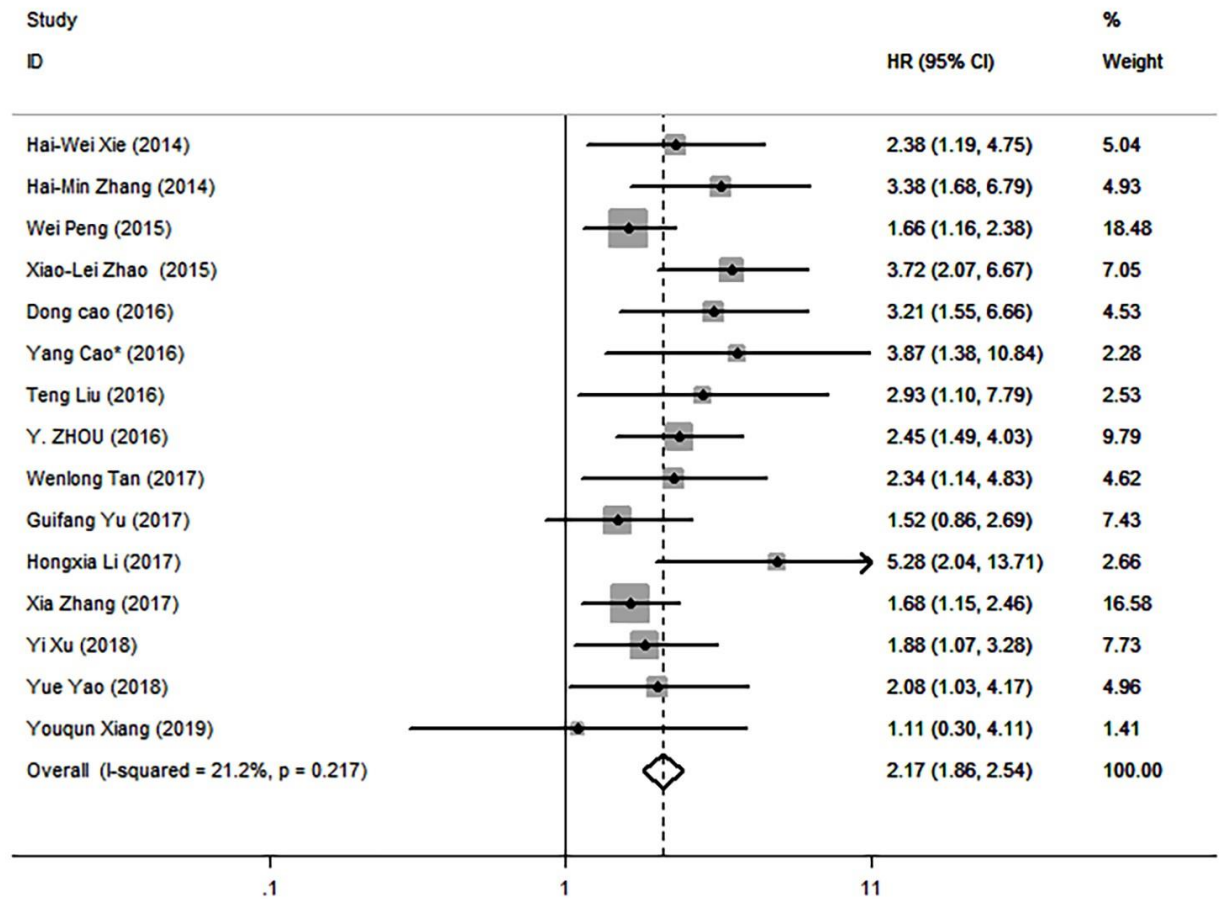

Supplement: f1 [file 5868602.f1.pdf]
